# Supplementary material for: Metallome evolution in ageingC. elegansand a copper stable isotope perspective
Source: Royal Society of Chemistry journal article supplement (doi:10.1039/c7mt00318h), 2018-01-01
Supplement: c7mt00318h1.xlsx [file c7mt00318h1.xlsx]

## Sheet: Feuil1
Table 1: Trace and major element concentrations as well as copper (Cu) and zinc (Zn) isotopic compositions measured in four different strains of C.elegans nematodes and certified standards.
Sample Name	Gene Mutation	Age (days)		Ti	Mn	Fe	Cu	Zn	Sr	Cd	Mg	Ca	K	Na	P	S		δ65CuNIST-SRM976	δ66ZnJMC3-0749L
				(ppm=µg/g)														(‰)
Samples
e1370 D2-1	daf-2	2		9.49596	<DL	122.335	<DL	82.7585	1.24888	0.620961	1686.82	2364.34	10096.1	1284.96	15782.9	5638.76		n/a	-0.231956
e1370 D2-2				7.49902	13.0212	96.2	4.58029	72.0713	1.27507	0.381698	1774.46	2578.79	11930.7	2079.65	17774.9	6116.88		-0.00335465	-0.139388
e1370 D2-3				5.40076	14.9652	90.3153	3.86362	83.0346	0.927323	0.63563	1658.77	2671.05	11263.2	1021.49	16921.1	6087.72		-0.487866	-0.15629
Average				7.46524	13.9932	102.95	4.22196	79.2881	1.15042	0.546096	1706.68	2538.06	11096.7	1462.04	16826.3	5947.79		-0.24561	-0.175878
2SD				4.09562	2.74935	34.0873	1.01353	12.503	0.387308	0.285124	120.694	314.719	1857.14	1101.71	1998.7	536.046		0.685202	0.0985893
e1370 D10-1	daf-2	10		27.0975	<DL	242.56	<DL	127.33	2.67154	1.19369	1722.14	4746.56	8250.38	1935.88	16992.4	5480.92		n/a	-0.221007
e1370 D10-2				12.9395	14.0956	148.509	2.48002	82.4937	2.48868	0.949617	1836.89	6853.33	10795.6	963.556	19920	5982.22		-0.872651	-0.239589
e1370 D10-3				12.1999	19.2895	145.271	3.51112	100.924	2.36065	1.19467	1896	6316.67	12446.7	1285	19510	5706.67		-0.832612	-0.16633
Average				17.4123	16.6926	178.78	2.99557	103.583	2.50696	1.11266	1818.34	5972.19	10497.5	1394.81	18807.5	5723.27		-0.852631	-0.208975
2SD				16.7915	7.34534	110.518	1.45819	45.0727	0.312501	0.282398	176.805	2189.63	4227.91	990.75	3170.45	502.13		0.0566231	0.0761662
e1370 D17-1	daf-2	17		16.8606	<DL	229.907	<DL	146.056	2.76354	1.35947	1571.11	5853.7	5959.26	2257.41	15157.4	4750		n/a	-0.220836
e1370 D17-2				12.4993	13.1759	152.711	2.87941	76.689	2.44129	0.792181	1648.81	7047.62	8220.24	1164.88	17303.6	4499.4		-0.809303	-0.139018
e1370 D17-3				14.2434	27.1282	186.724	3.41273	118.403	2.63497	1.46793	1718.56	7484.54	9130.58	1625.43	18793.8	4972.51		-1.34415	-0.178435
Average				14.5344	20.152	189.781	3.14607	113.716	2.61326	1.20653	1646.16	6795.29	7770.03	1682.57	17084.9	4740.64		-1.07673	-0.17943
2SD				4.39035	19.7316	77.3773	0.754225	69.8406	0.324438	0.72582	147.517	1688.38	3265.79	1097	3656.07	473.382		0.756391	0.0818367
N2 D2-1	No	2		8.14263	<DL	96.4803	<DL	86.5486	1.88736	1.41435	2152.61	3253.82	15622.5	1363.86	21502	6591.97		n/a	-0.347079
N2 D2-2				5.6773	13.2864	62.4351	2.02298	65.9574	1.16192	0.456249	2029.89	3372.99	15603.4	9890.8	24092	6632.18		-0.913133	-0.177219
N2 D2-3				9.15048	18.4754	92.3253	2.56647	71.7294	1.70567	0.898818	2137.25	4525.49	13215.7	1419.22	22019.6	6886.27		-0.896619	-0.323218
Average				7.6568	15.8809	83.7469	2.29472	74.7451	1.58498	0.923139	2106.58	3717.43	14813.9	4224.63	22537.9	6703.48		-0.904876	-0.282506
2SD				3.57366	7.33838	37.1463	0.768619	21.2433	0.754957	0.959026	133.73	1404.66	2768.21	9814.27	2741.09	319.161		0.023354	0.183916
N2 D10-1	No	10		4.58409	<DL	213.54	<DL	82.5231	4.1671	2.54463	2489.11	11366.3	9834.65	2274.26	23584.2	5705.94		n/a	-0.559806
N2 D10-2				21.8677	17.7905	169.031	4.17241	72.5124	3.74996	1.2925	2732.62	11280.1	13734	2340.07	26805	6684.4		-0.814141	-0.260823
N2 D10-3				19.8832	22.9895	173.437	2.91505	70.9697	3.40168	1.64255	2426.95	10390.1	11248.2	1674.47	24326.2	6195.04		-1.10915	-0.481381
Average				15.445	20.39	185.336	3.54373	75.3351	3.77291	1.82656	2549.56	11012.2	11605.6	2096.27	24905.1	6195.12		-0.961646	-0.434003
2SD				18.916	7.35249	49.0486	1.77818	12.5452	0.766451	1.29206	323.11	1080.97	3948.22	733.533	3373.26	978.457		0.417207	0.310039
mu86 D2-1	daf-16	2		5.3167	<DL	107.944	<DL	80.0483	1.21867	0.603852	2135.51	2919.1	13236	1264.04	20018	6276.4		n/a	-0.235468
mu86 D2-2				4.0957	13.2728	53.1718	1.78944	63.0918	<DL	<DL	1817.46	2455.56	12811.1	6449.21	20873	5698.41		-0.518662	-0.322542
mu86 D2-3				7.51816	21.5006	112.909	2.43599	82.1209	1.56229	1.17039	2107.78	4138.33	13955.6	1597.78	21516.7	6644.44		-1.19932	-0.223071
Average				5.64352	17.3867	91.3416	2.11272	75.087	1.39048	0.887121	2020.25	3171	13334.2	3103.68	20802.6	6206.42		-0.85899	-0.26036
2SD				3.46896	11.6358	66.2982	0.914352	20.8794	0.485953	0.801205	352.331	1738.42	1157.03	5804.23	1503.65	953.766		0.962593	0.108413
mu86 D10-1	daf-16	10		14.9815	<DL	244.778	<DL	112.412	3.47003	2.322	2245	9366.67	8045.83	3641.25	22429.2	6725		n/a	-0.320896
mu86 D10-2				16.0592	19.6009	174.052	4.42142	78.169	2.65186	1.17107	2440	8294.44	13727.8	2347.78	24077.8	6755.56		-0.58955	-0.143607
mu86 D10-3				19.276	29.1596	201.945	3.53401	80.3041	3.22628	2.24921	2181.88	10166.7	11884.1	2282.61	23601.4	6173.91		-1.04207	-0.269816
Average				16.7722	24.3802	206.925	3.97772	90.2951	3.11606	1.91409	2288.96	9275.93	11219.2	2757.21	23369.5	6551.49		-0.815811	-0.244773
2SD				4.46858	13.5181	71.2493	1.255	38.3674	0.840157	1.28901	269.113	1878.81	5797.46	1532.58	1696.87	654.695		0.639961	0.182518
CF1588 D2-1	daf-2/daf-16	2		20.227	<DL	168.9	<DL	89.4006	2.2067	0.778823	2155.18	2853.01	12973.5	1064.34	20356.6	6445.78		n/a	-0.136673
CF1588 D2-2				<DL	15.1513	39.2706	2.04364	71.5342	<DL	<DL	2048.15	2940.74	13625.9	4092.59	22777.8	6696.3		-0.177728	-0.396212
CF1588 D2-3				7.30798	20.5189	104.699	2.57037	84.3158	1.43688	0.886182	2029.86	4027.08	12923.6	1490.28	20826.4	6554.17		-0.893973	-0.178864
Average				13.7675	17.8351	104.29	2.307	81.7502	1.82179	0.832503	2077.73	3273.61	13174.3	2215.74	21320.3	6565.42		-0.53585	-0.237249
2SD				18.2702	7.59097	129.631	0.744902	18.4107	1.0887	0.151829	135.389	1308	783.752	3278.6	2567.82	251.27		1.01292	0.278545
CF1588 D10-1	daf-2/daf-16	10		5.64423	<DL	297.369	<DL	108.528	3.73654	3.70852	2369.18	10217.8	7670.39	2162.39	24135.2	5803.09		n/a	-0.233396
CF1588 D10-2				14.7708	19.1918	171.526	3.60675	73.9395	2.40732	1.15636	2186.46	8102.08	12416.7	1983.33	23406.2	6823.96		-0.548668	-0.207092
CF1588 D10-3				18.5715	32.2352	207.126	3.86597	95.8685	3.13563	1.94072	2133.33	9817.46	12087.3	1913.49	23261.9	6303.97		-1.10574	-0.250908
Average				12.9955	25.7135	225.341	3.73636	92.7787	3.09316	2.26853	2229.66	9379.1	10724.8	2019.74	23601.1	6310.34		-0.827202	-0.230465
2SD				13.2879	18.4461	129.738	0.366599	35.0002	1.33125	2.61456	247.433	2247.79	5300.61	256.765	936.195	1020.93		0.787812	0.0441088
Reference standards (OEP and 1577c)
This study
OEP ± 2sd (n)				n/a	0.04±0.03 (2)	17.89±6.56 (3)	10.33±1.75 (3)	7.12±1.21 (3)	1.76±0.16 (3)	n/a	261.46±50.78 (3)	871.57±45.16 (3)	1987.43±154.60 (3)	35070.15±3699.17 (3)	1117.60±104.32 (3)	10012.40±860.76 (3)		-1.11±0.16 (9)	+0.73±0.04 (3)
1577c ± 2sd (n)				n/a	9.42±0.23 (2)	183.30±3.28 (2)	259.85±6.02 (2)	173.39±2.15 (2)	n/a	0.10±0.01 (2)	588.77±2.56 (2)	139.56 (1)	11417.78 (1)	2128.89 (1)	11520.00 (1)	7605.93 (1)		+0.35±0.09 (5)	-0.19±0.09 (6)
Reference values
OEP*± 2sd (n)				n/a	0.08±0.07 (15)	18.98±5.01 (15)	10.48±1.42 (15)	7.19±1.19 (15)	1.72±0.87 (15)	0.01±0.02 (15)	257.83±68.26 (15)	869.69±143.71 (15)	1989.10±404.88 (15)	34494.33±8247.62 (15)	1067.69±152.23 (15)	9792.13±1476.88 (15)		-1.15±0.20 (35)	+0.73±0.09 (35)
1577c** ± 2sd				n/a	10.46±0.47	197.94±0.65	272.50±4.60	181.10±1.00	0.10±0.004	0.10±0.001	620.00±42.00	131.00±10.00	10230.00±640.00	2033.00±64.00	11750.00±270.00	7490.00±340.00		+0.37±0.14 (45)*	-0.16±0.15 (45)*
* The worm strains include: (1) wild-type (N2) worms, (2) short-lived mutants of the daf-16 FOXO transcription factor: daf-16 (mu86), (3) long-lived mutants of the insulin/IGF1 receptor : daf-2(e1370) and (4) double mutants for both daf-2 and daf-16 alleles: CF1588. '-1', '-2' and '-3' stands for complete duplicate analyses. OEP and 1577c refer to old ewe plasma (i.e. in-house standard) and bovin…
